# Supplementary material for: Updated distribution of the invasive Megachile sculpturalis (Hymenoptera: Megachilidae) in Italy and its first record on a Mediterranean island
Source: Biodivers Data J. 2020 Nov 26;8:e57783. doi: 10.3897/BDJ.8.e57783 (PMC7714772; doi:10.3897/BDJ.8.e57783)
Supplement: Supplementary material 2 — Cumulative dataset of the Italian localities of M. sculpturalis [file bdj-08-e57783-s002.xlsx]

## Sheet: Occurrences
occurrenceID	basisOfRecord	eventDate	kingdom	scientificName	taxonRank	locationID	decimalLatitude	decimalLongitude	geodeticDatum	countryCode	elevation_asl	landscape	nesting	plant_interaction
1	Literature	2009-07-07	Animalia	Megachile (Callomegachile) sculpturalis (Smith, 1853)	species	Verbania	45.9327	8.55493	WGS84	IT	197	Urban	artificial nest
2	Data mining	2013-09-10	Animalia	Megachile (Callomegachile) sculpturalis (Smith, 1853)	species	Sumirago	45.7381	8.78664	WGS84	IT	392	Rural	Natural cavity/elsewhere
3	Literature	2013-07-31	Animalia	Megachile (Callomegachile) sculpturalis (Smith, 1853)	species	Verbania	45.9327	8.55493	WGS84	IT	197	Urban	artificial nest
4	Data mining	2014-06-27	Animalia	Megachile (Callomegachile) sculpturalis (Smith, 1853)	species	Pavia	45.1895	9.1602	WGS84	IT	77	Urban		Wisteria floribunda
5	Data mining	2014-06-29	Animalia	Megachile (Callomegachile) sculpturalis (Smith, 1853)	species	Sostegno	45.6529	8.27023	WGS84	IT	350	Rural	Natural cavity/elsewhere
6	Literature	2014-07-12	Animalia	Megachile (Callomegachile) sculpturalis (Smith, 1853)	species	Pegli	44.4319	8.81367	WGS84	IT	20	Urban
7	Data mining	2015-07-03	Animalia	Megachile (Callomegachile) sculpturalis (Smith, 1853)	species	Merano	46.6654	11.1625	WGS84	IT	325	Urban	Natural cavity/elsewhere
8	Data mining	2015-07-14	Animalia	Megachile (Callomegachile) sculpturalis (Smith, 1853)	species	Calenzano	43.8932	11.1936	WGS84	IT	270	Natural		Cichorium intybus
9	Data mining	2016-08-08	Animalia	Megachile (Callomegachile) sculpturalis (Smith, 1853)	species	Villanova d'Asti	44.9438	7.93628	WGS84	IT	260	Rural	artificial nest
10	Citizen Science	2016-08-21	Animalia	Megachile (Callomegachile) sculpturalis (Smith, 1853)	species	Rivarolo del Re ed Uniti	45.0369	10.4994	WGS84	IT	22	Rural		Wisteria sp.
11	Data mining	2016-07-25	Animalia	Megachile (Callomegachile) sculpturalis (Smith, 1853)	species	Maleo	45.1669	9.76165	WGS84	IT	58	Rural
12	Direct observation	2016-07-25	Animalia	Megachile (Callomegachile) sculpturalis (Smith, 1853)	species	Sanremo	43.8236	7.77704	WGS84	IT	20	Urban	Natural cavity/elsewhere
13	Direct observation	2016-07-10	Animalia	Megachile (Callomegachile) sculpturalis (Smith, 1853)	species	Gazzuolo	45.0678	10.5818	WGS84	IT	25	Rural	artificial nest
14	Direct observation	2016-07-01	Animalia	Megachile (Callomegachile) sculpturalis (Smith, 1853)	species	Bologna	44.5242	11.3513	WGS84	IT	35	Urban	artificial nest
15	Literature	2016-07-13	Animalia	Megachile (Callomegachile) sculpturalis (Smith, 1853)	species	Genova	44.4057	8.9396	WGS84	IT	20	Urban
16	Literature	2016-07-13	Animalia	Megachile (Callomegachile) sculpturalis (Smith, 1853)	species	Genova	44.4014	8.95993	WGS84	IT	20	Urban
17	Literature	2016-07-13	Animalia	Megachile (Callomegachile) sculpturalis (Smith, 1853)	species	Genova	44.4027	8.94331	WGS84	IT	20	Urban
18	Literature	2016-07-25	Animalia	Megachile (Callomegachile) sculpturalis (Smith, 1853)	species	Genova	44.4027	8.94331	WGS84	IT	20	Urban
19	Literature	2016-07-27	Animalia	Megachile (Callomegachile) sculpturalis (Smith, 1853)	species	Genova	44.4027	8.94331	WGS84	IT	20	Urban
20	Data mining	2017-07-18	Animalia	Megachile (Callomegachile) sculpturalis (Smith, 1853)	species	Agrate Brianza	45.5611	9.34893	WGS84	IT	150	Rural	artificial nest
21	Citizen Science	2017-07-03	Animalia	Megachile (Callomegachile) sculpturalis (Smith, 1853)	species	Santarcangelo di Romagna	44.0631	12.4475	WGS84	IT	42	Rural	Natural cavity/elsewhere
22	Citizen Science	2017-07-20	Animalia	Megachile (Callomegachile) sculpturalis (Smith, 1853)	species	Lavezzola	44.5616	11.8762	WGS84	IT	7	Rural
23	Literature	2017-06-09	Animalia	Megachile (Callomegachile) sculpturalis (Smith, 1853)	species	Vigarano Mainarda	44.8335	11.4613	WGS84	IT	10	Rural		ID 6
24	Citizen Science	2017-08-19	Animalia	Megachile (Callomegachile) sculpturalis (Smith, 1853)	species	Verbania	45.9389	8.49379	WGS84	IT	197	Rural	artificial nest
25	Citizen Science	2017-07-06	Animalia	Megachile (Callomegachile) sculpturalis (Smith, 1853)	species	Cesena	44.137	12.2416	WGS84	IT	44	Urban	artificial nest
26	Citizen Science	2017-07-03	Animalia	Megachile (Callomegachile) sculpturalis (Smith, 1853)	species	Borgo San Giacomo	45.3225	9.93264	WGS84	IT	70	Rural		Tetradium daniellii
27	Data mining	2017-08-03	Animalia	Megachile (Callomegachile) sculpturalis (Smith, 1853)	species	Rovereto	45.8814	11.048	WGS84	IT	204	Urban
28	Data mining	2017-07-30	Animalia	Megachile (Callomegachile) sculpturalis (Smith, 1853)	species	Portogruaro	45.7792	12.8406	WGS84	IT	5	Rural	artificial nest
29	Direct observation	2017-08-10	Animalia	Megachile (Callomegachile) sculpturalis (Smith, 1853)	species	Tredozio	44.0802	11.7411	WGS84	IT	334	Rural		Sophora japonica
30	Direct observation	2017-07-10	Animalia	Megachile (Callomegachile) sculpturalis (Smith, 1853)	species	Mantova	45.1568	10.7837	WGS84	IT	19	Urban	artificial nest
31	Direct observation	2017-07-25	Animalia	Megachile (Callomegachile) sculpturalis (Smith, 1853)	species	Toscolano Maderno	45.6366	10.6082	WGS84	IT	86	Rural		Sophora japonica
32	Direct observation	2017-07-13	Animalia	Megachile (Callomegachile) sculpturalis (Smith, 1853)	species	Vallombrosa	43.7314	11.5533	WGS84	IT	980	Natural
33	Direct observation	2017-07-19	Animalia	Megachile (Callomegachile) sculpturalis (Smith, 1853)	species	Ponticella	44.4538	11.3817	WGS84	IT	62	Natural	artificial nest
34	Direct observation	2017-07-10	Animalia	Megachile (Callomegachile) sculpturalis (Smith, 1853)	species	Nervesa della Battaglia	45.8186	12.2021	WGS84	IT	78	Rural
35	Direct observation	2017-06-22	Animalia	Megachile (Callomegachile) sculpturalis (Smith, 1853)	species	Firenze	43.7822	11.1697	WGS84	IT	38	Urban
36	Direct observation	2017-07-17	Animalia	Megachile (Callomegachile) sculpturalis (Smith, 1853)	species	Legnano	45.5495	8.94403	WGS84	IT	199	Urban
37	Literature	2017-07-18	Animalia	Megachile (Callomegachile) sculpturalis (Smith, 1853)	species	Romans d'Isonzo	45.887	13.4469	WGS84	IT	23	Rural	Natural cavity/elsewhere
38	Literature	2017-07-20	Animalia	Megachile (Callomegachile) sculpturalis (Smith, 1853)	species	Romans d'Isonzo	45.887	13.4469	WGS84	IT	23	Rural		Ligustrum lucidulum
39	Literature	2017-07-14	Animalia	Megachile (Callomegachile) sculpturalis (Smith, 1853)	species	Genova	44.4032	8.97705	WGS84	IT	20	Urban
40	Direct observation	2017-07-19	Animalia	Megachile (Callomegachile) sculpturalis (Smith, 1853)	species	San Lazzaro di Savena, Parco del Bel Poggio BO	44.4541	11.3828	WGS84	IT	386	Urban	artificial nest
41	Data mining	2018-07-21	Animalia	Megachile (Callomegachile) sculpturalis (Smith, 1853)	species	Camisano Vicentino	45.5231	11.7087	WGS84	IT	27	Rural	artificial nest
42	Data mining	2018-07-24	Animalia	Megachile (Callomegachile) sculpturalis (Smith, 1853)	species	Almese	45.1171	7.39398	WGS84	IT	364	Rural
43	Data mining	2018-07-16	Animalia	Megachile (Callomegachile) sculpturalis (Smith, 1853)	species	Bergamo	45.6988	9.67313	WGS84	IT	249	Urban	Natural cavity/elsewhere
44	Data mining	2018-07-27	Animalia	Megachile (Callomegachile) sculpturalis (Smith, 1853)	species	Monterotondo	42.0589	12.5954	WGS84	IT	165	Rural
45	Data mining	2018-08-20	Animalia	Megachile (Callomegachile) sculpturalis (Smith, 1853)	species	Varese	45.8156	8.8173	WGS84	IT	382	Urban	artificial nest
46	Data mining	2018-07-19	Animalia	Megachile (Callomegachile) sculpturalis (Smith, 1853)	species	Moncalieri	45.0013	7.68142	WGS84	IT	260	Urban	Natural cavity/elsewhere
47	Data mining	2018-07-25	Animalia	Megachile (Callomegachile) sculpturalis (Smith, 1853)	species	Brescia	45.5357	10.2233	WGS84	IT	149	Urban	Natural cavity/elsewhere
48	Data mining	2018-07-07	Animalia	Megachile (Callomegachile) sculpturalis (Smith, 1853)	species	Bassano del Grappa	45.7626	11.725	WGS84	IT	129	Urban
49	Citizen Science	2018-07-08	Animalia	Megachile (Callomegachile) sculpturalis (Smith, 1853)	species	Cavallara (Viadana)	44.9982	10.6547	WGS84	IT	26	Rural		Firmiana platanifolia
50	Citizen Science	2018-07-09	Animalia	Megachile (Callomegachile) sculpturalis (Smith, 1853)	species	Baricella	44.6521	11.5382	WGS84	IT	11	Rural	Natural cavity/elsewhere
51	Citizen Science	2019-07-28	Animalia	Megachile (Callomegachile) sculpturalis (Smith, 1853)	species	Ponteranica	45.7317	9.6263	WGS84	IT	245	Rural	Natural cavity/elsewhere	Epilobium angustifolium
52	Citizen Science	2018-08-23	Animalia	Megachile (Callomegachile) sculpturalis (Smith, 1853)	species	Cisano Bergamasco	45.7571	9.46508	WGS84	IT	267	Rural	Natural cavity/elsewhere
53	Citizen Science	2018-07-06	Animalia	Megachile (Callomegachile) sculpturalis (Smith, 1853)	species	Tirano	46.2173	10.1746	WGS84	IT	458	Rural		Syringa sp.
54	Citizen Science	2018-07-25	Animalia	Megachile (Callomegachile) sculpturalis (Smith, 1853)	species	Settimo Torinese	45.1503	7.77045	WGS84	IT	210	Urban
55	Citizen Science	2018-07-25	Animalia	Megachile (Callomegachile) sculpturalis (Smith, 1853)	species	Imperia	43.8583	7.67584	WGS84	IT	10	Natural	artificial nest
56	Citizen Science	2018-07-19	Animalia	Megachile (Callomegachile) sculpturalis (Smith, 1853)	species	Trento	46.0639	11.1163	WGS84	IT	500	Urban	artificial nest
57	Citizen Science	2018-07-11	Animalia	Megachile (Callomegachile) sculpturalis (Smith, 1853)	species	Barbarano Vicentino	45.4008	11.5663	WGS84	IT	151	Rural
58	Citizen Science	2019-07-06	Animalia	Megachile (Callomegachile) sculpturalis (Smith, 1853)	species	Roma	41.9135	12.4848	WGS84	IT	21	Urban
59	Citizen Science	2018-06-30	Animalia	Megachile (Callomegachile) sculpturalis (Smith, 1853)	species	Serso	46.0751	11.2503	WGS84	IT	545	Rural
60	Literature	2018-06-18	Animalia	Megachile (Callomegachile) sculpturalis (Smith, 1853)	species	Ferrara	44.8425	11.6253	WGS84	IT	9	Urban
61	Data mining	2018-08-20	Animalia	Megachile (Callomegachile) sculpturalis (Smith, 1853)	species	Carate Brianza	45.6725	9.23505	WGS84	IT	256	Urban
62	Data mining	2019-08-02	Animalia	Megachile (Callomegachile) sculpturalis (Smith, 1853)	species	Genova	44.406	8.94133	WGS84	IT	19	Urban		Lavandula sp.
63	Data mining	2018-07-20	Animalia	Megachile (Callomegachile) sculpturalis (Smith, 1853)	species	Mestrino	45.4414	11.7583	WGS84	IT	20	Rural	artificial nest
64	Direct observation	2018-08-06	Animalia	Megachile (Callomegachile) sculpturalis (Smith, 1853)	species	Torino	45.068	7.64164	WGS84	IT	239	Urban
65	Direct observation	2018-07-31	Animalia	Megachile (Callomegachile) sculpturalis (Smith, 1853)	species	Bologna	44.5001	11.3528	WGS84	IT	12	Urban	artificial nest
66	Direct observation	2018-07-28	Animalia	Megachile (Callomegachile) sculpturalis (Smith, 1853)	species	Mezzolara	44.5891	11.5664	WGS84	IT	20	Rural	artificial nest
67	Direct observation	2018-07-10	Animalia	Megachile (Callomegachile) sculpturalis (Smith, 1853)	species	Castel San Pietro Terme	44.3993	11.5872	WGS84	IT	75	Rural	Natural cavity/elsewhere
68	Direct observation	2018-07-05	Animalia	Megachile (Callomegachile) sculpturalis (Smith, 1853)	species	Isola Vicentina	45.6302	11.4451	WGS84	IT	55	Rural	Natural cavity/elsewhere
69	Direct observation	2018-08-20	Animalia	Megachile (Callomegachile) sculpturalis (Smith, 1853)	species	Roma	41.929	12.4978	WGS84	IT	21	Urban
70	Direct observation	2018-07-15	Animalia	Megachile (Callomegachile) sculpturalis (Smith, 1853)	species	Castel San Pietro Terme	44.4286	11.5208	WGS84	IT	57	Rural	artificial nest
71	Direct observation	2018-07-13	Animalia	Megachile (Callomegachile) sculpturalis (Smith, 1853)	species	Bologna	44.4891	11.3231	WGS84	IT	40	Urban	artificial nest
72	Direct observation	2018-07-24	Animalia	Megachile (Callomegachile) sculpturalis (Smith, 1853)	species	Marina Romea	44.5169	12.2711	WGS84	IT	1	Rural
73	Direct observation	2018-07-25	Animalia	Megachile (Callomegachile) sculpturalis (Smith, 1853)	species	Modena	44.6484	10.93	WGS84	IT	34	Urban	artificial nest
74	Direct observation	2018-07-11	Animalia	Megachile (Callomegachile) sculpturalis (Smith, 1853)	species	Verona	45.4659	11.0604	WGS84	IT	59	Rural	artificial nest
75	Direct observation	2018-06-19	Animalia	Megachile (Callomegachile) sculpturalis (Smith, 1853)	species	Mirano	45.4964	12.0447	WGS84	IT	9	Rural		Ailanthus altissima
76	Direct observation	2018-06-07	Animalia	Megachile (Callomegachile) sculpturalis (Smith, 1853)	species	Guastalla	44.9201	10.6551	WGS84	IT	25	Rural	artificial nest
77	Direct observation	2018-07-20	Animalia	Megachile (Callomegachile) sculpturalis (Smith, 1853)	species	Crespina Lorenzana	43.5704	10.5629	WGS84	IT	86	Rural
78	Direct observation	2018-07-18	Animalia	Megachile (Callomegachile) sculpturalis (Smith, 1853)	species	Selvazzano Dentro	45.3902	11.7991	WGS84	IT	18	Rural
79	Direct observation	2018-08-12	Animalia	Megachile (Callomegachile) sculpturalis (Smith, 1853)	species	Pavia	45.1895	9.1602	WGS84	IT	77	Urban		Wisteria floribunda
80	Data mining	2019-07-17	Animalia	Megachile (Callomegachile) sculpturalis (Smith, 1853)	species	Borgo San Lorenzo	43.9555	11.3807	WGS84	IT	193	Rural		Lavandula sp.
81	Data mining	2019-07-27	Animalia	Megachile (Callomegachile) sculpturalis (Smith, 1853)	species	Firenzuola	44.1196	11.3808	WGS84	IT	422	Rural		Cirsium sp.
82	Data mining	2019-06-06	Animalia	Megachile (Callomegachile) sculpturalis (Smith, 1853)	species	Massarosa	43.87	10.3394	WGS84	IT	10	Rural		Wisteria sinensis
83	Data mining	2019-07-28	Animalia	Megachile (Callomegachile) sculpturalis (Smith, 1853)	species	Forlì	44.1877	12.0088	WGS84	IT	34	Urban		Lavandula sp.
84	Data mining	2019-06-29	Animalia	Megachile (Callomegachile) sculpturalis (Smith, 1853)	species	Isolabona	43.8821	7.63424	WGS84	IT	106	Natural		Lavandula sp.
85	Data mining	2019-08-18	Animalia	Megachile (Callomegachile) sculpturalis (Smith, 1853)	species	Bevagna	42.9376	12.6025	WGS84	IT	210	Rural	artificial nest
86	Data mining	2019-08-12	Animalia	Megachile (Callomegachile) sculpturalis (Smith, 1853)	species	Santa Croce sull'Arno	43.7179	10.7722	WGS84	IT	18	Natural
87	Data mining	2019-07-05	Animalia	Megachile (Callomegachile) sculpturalis (Smith, 1853)	species	Genova	44.407	8.94004	WGS84	IT	19	Urban
88	Data mining	2019-07-25	Animalia	Megachile (Callomegachile) sculpturalis (Smith, 1853)	species	Lagosanto	44.7641	12.1331	WGS84	IT	2	Rural
89	Data mining	2019-07-16	Animalia	Megachile (Callomegachile) sculpturalis (Smith, 1853)	species	Avesa	45.4853	10.9915	WGS84	IT	59	Rural		Vitex agnus-castus
90	Data mining	2019-07-20	Animalia	Megachile (Callomegachile) sculpturalis (Smith, 1853)	species	Parco Alto Garda Bresciano	45.6887	10.6453	WGS84	IT		Natural
91	Data mining	2019-07-14	Animalia	Megachile (Callomegachile) sculpturalis (Smith, 1853)	species	Trento	46.1035	11.0626	WGS84	IT	500	Urban		Lavandula sp.
92	Data mining	2019-08-31	Animalia	Megachile (Callomegachile) sculpturalis (Smith, 1853)	species	Siena	43.3221	11.2974	WGS84	IT	322	Urban		Wisteria sinensis
93	Data mining	2019-08-25	Animalia	Megachile (Callomegachile) sculpturalis (Smith, 1853)	species	Noviglio	45.3601	9.05031	WGS84	IT	103	Rural		Wisteria sinensis
94	Data mining	2019-07-29	Animalia	Megachile (Callomegachile) sculpturalis (Smith, 1853)	species	La Spezia	44.1192	9.81374	WGS84	IT	3	Urban		Epilobium angustifolium
95	Data mining	2019-07-20	Animalia	Megachile (Callomegachile) sculpturalis (Smith, 1853)	species	Pisa	43.6834	10.4212	WGS84	IT	4	Urban
96	Data mining	2019-07-19	Animalia	Megachile (Callomegachile) sculpturalis (Smith, 1853)	species	San Giovanni in Persiceto	44.6386	11.1823	WGS84	IT	21	Rural
97	Data mining	2018-07-03	Animalia	Megachile (Callomegachile) sculpturalis (Smith, 1853)	species	Roma	41.9264	12.6497	WGS84	IT	21	Urban	Natural cavity/elsewhere
98	Data mining	2018-06-19	Animalia	Megachile (Callomegachile) sculpturalis (Smith, 1853)	species	Genova	44.4061	8.94077	WGS84	IT	19	Urban
99	Data mining	2019-08-06	Animalia	Megachile (Callomegachile) sculpturalis (Smith, 1853)	species	Badia Polesine	45.0951	11.4941	WGS84	IT	11	Rural		Citrus sp.
100	Data mining	2019-08-07	Animalia	Megachile (Callomegachile) sculpturalis (Smith, 1853)	species	Prato	43.8793	11.078	WGS84	IT	65	Urban	artificial nest
101	Data mining	2019-08-17	Animalia	Megachile (Callomegachile) sculpturalis (Smith, 1853)	species	Bozzolo	45.1066	10.4806	WGS84	IT	30	Rural		Epilobium angustifolium
102	Data mining	2019-07-30	Animalia	Megachile (Callomegachile) sculpturalis (Smith, 1853)	species	Loro Ciuffenna	43.5876	11.63	WGS84	IT	600	Natural		Lavandula sp.
103	Data mining	2019-09-01	Animalia	Megachile (Callomegachile) sculpturalis (Smith, 1853)	species	Sant'Arcangelo	40.2515	16.2852	WGS84	IT	388	Rural
104	Data mining	2019-08-09	Animalia	Megachile (Callomegachile) sculpturalis (Smith, 1853)	species	Scena	46.6898	11.1897	WGS84	IT	600	Rural	artificial nest
105	Data mining	2019-08-03	Animalia	Megachile (Callomegachile) sculpturalis (Smith, 1853)	species	Atri	42.5801	13.9744	WGS84	IT	442	Rural
106	Data mining	2019-07-19	Animalia	Megachile (Callomegachile) sculpturalis (Smith, 1853)	species	Cocconato	45.0862	8.03825	WGS84	IT	480	Rural		Lavandula sp.
107	Data mining	2019-07-20	Animalia	Megachile (Callomegachile) sculpturalis (Smith, 1853)	species	Milano	45.4731	9.18528	WGS84	IT	122	Urban	Natural cavity/elsewhere
108	Data mining	2019-07-17	Animalia	Megachile (Callomegachile) sculpturalis (Smith, 1853)	species	Novara	45.4489	8.61612	WGS84	IT	162	Urban		Trifolium pratense
109	Data mining	2019-07-15	Animalia	Megachile (Callomegachile) sculpturalis (Smith, 1853)	species	La Marzola	46.0577	11.1437	WGS84	IT	630	Rural		Lavandula sp.
110	Data mining	2019-07-30	Animalia	Megachile (Callomegachile) sculpturalis (Smith, 1853)	species	Campomorone	44.5142	8.88099	WGS84	IT	680	Rural		Rubus sp.
111	Data mining	2019-07-13	Animalia	Megachile (Callomegachile) sculpturalis (Smith, 1853)	species	Rovigo	45.072	11.7882	WGS84	IT	7	Urban		Lavandula sp.
112	Citizen Science	2019-07-08	Animalia	Megachile (Callomegachile) sculpturalis (Smith, 1853)	species	Bologna	44.5001	11.3528	WGS84	IT	12	Urban	artificial nest
113	Citizen Science	2019-07-24	Animalia	Megachile (Callomegachile) sculpturalis (Smith, 1853)	species	Alleghe	46.4074	12.023	WGS84	IT	979	Natural		Lavandula sp.
114	Citizen Science	2019-07-26	Animalia	Megachile (Callomegachile) sculpturalis (Smith, 1853)	species	Firenze	43.7913	11.2278	WGS84	IT	50	Urban
115	Citizen Science	2019-07-25	Animalia	Megachile (Callomegachile) sculpturalis (Smith, 1853)	species	Rio Saliceto	44.81	10.8038	WGS84	IT	24	Rural	artificial nest
116	Citizen Science	2019-07-20	Animalia	Megachile (Callomegachile) sculpturalis (Smith, 1853)	species	Conzano	45.0201	8.45673	WGS84	IT	262	Rural		Lavandula sp.
117	Citizen Science	2019-08-10	Animalia	Megachile (Callomegachile) sculpturalis (Smith, 1853)	species	Milano	45.4642	9.18998	WGS84	IT	122	Urban	artificial nest
118	Citizen Science	2019-08-06	Animalia	Megachile (Callomegachile) sculpturalis (Smith, 1853)	species	San Quirino	46.0363	12.6771	WGS84	IT	116	Rural	artificial nest
119	Citizen Science	2019-08-08	Animalia	Megachile (Callomegachile) sculpturalis (Smith, 1853)	species	Milano	45.4756	9.11632	WGS84	IT	122	Urban	artificial nest
120	Citizen Science	2019-08-04	Animalia	Megachile (Callomegachile) sculpturalis (Smith, 1853)	species	Pisa	43.7208	10.4166	WGS84	IT	4	Urban	artificial nest
121	Citizen Science	2019-07-31	Animalia	Megachile (Callomegachile) sculpturalis (Smith, 1853)	species	Sestola	44.2598	10.7543	WGS84	IT	1020	Rural	artificial nest	Lavandula sp.
122	Citizen Science	2019-07-30	Animalia	Megachile (Callomegachile) sculpturalis (Smith, 1853)	species	Montale	43.9518	11.0311	WGS84	IT	85	Rural		Lavanda officinalis
123	Citizen Science	2018-08-16	Animalia	Megachile (Callomegachile) sculpturalis (Smith, 1853)	species	Ponteranica	45.7375	9.66713	WGS84	IT	245	Rural	Natural cavity/elsewhere
124	Citizen Science	2019-07-27	Animalia	Megachile (Callomegachile) sculpturalis (Smith, 1853)	species	Isola d'Asti	44.8332	8.19014	WGS84	IT	136	Rural	Natural cavity/elsewhere
125	Citizen Science	2019-07-28	Animalia	Megachile (Callomegachile) sculpturalis (Smith, 1853)	species	Monte Calderaro	44.358	11.5168	WGS84	IT	75	Rural	Natural cavity/elsewhere
126	Citizen Science	2019-08-06	Animalia	Megachile (Callomegachile) sculpturalis (Smith, 1853)	species	Morano Calabro	39.8553	16.0699	WGS84	IT	690	Rural		Lavandula sp.
127	Citizen Science	2019-08-08	Animalia	Megachile (Callomegachile) sculpturalis (Smith, 1853)	species	Castions di Strada	45.9074	13.1832	WGS84	IT	23	Rural	Natural cavity/elsewhere
128	Citizen Science	2019-08-04	Animalia	Megachile (Callomegachile) sculpturalis (Smith, 1853)	species	Montagnana	45.2328	11.4632	WGS84	IT	16	Rural		Citrus japonica
129	Citizen Science	2019-08-17	Animalia	Megachile (Callomegachile) sculpturalis (Smith, 1853)	species	Valdango	45.6448	11.3025	WGS84	IT	260	Urban		Syringa sp.
130	Citizen Science	2019-08-27	Animalia	Megachile (Callomegachile) sculpturalis (Smith, 1853)	species	Pisa	43.7311	10.4064	WGS84	IT	4	Urban
131	Citizen Science	2019-08-25	Animalia	Megachile (Callomegachile) sculpturalis (Smith, 1853)	species	Noviglio	45.3604	9.04679	WGS84	IT	103	Rural		Syringa sp.
132	Citizen Science	2019-08-19	Animalia	Megachile (Callomegachile) sculpturalis (Smith, 1853)	species	Merano	46.6615	11.1724	WGS84	IT	325	Urban	artificial nest
133	Citizen Science	2019-08-07	Animalia	Megachile (Callomegachile) sculpturalis (Smith, 1853)	species	Gogna	45.5253	11.5317	WGS84	IT	39	Rural		ID 3
134	Citizen Science	2019-08-15	Animalia	Megachile (Callomegachile) sculpturalis (Smith, 1853)	species	Capranica Prenestina	41.8971	12.9332	WGS84	IT	1100	Natural		Cirsium sp.
135	Citizen Science	2019-08-12	Animalia	Megachile (Callomegachile) sculpturalis (Smith, 1853)	species	Trento	46.0647	11.1137	WGS84	IT	500	Urban
136	Citizen Science	2019-08-04	Animalia	Megachile (Callomegachile) sculpturalis (Smith, 1853)	species	Trento	46.0662	11.1241	WGS84	IT	500	Urban
137	Citizen Science	2019-08-03	Animalia	Megachile (Callomegachile) sculpturalis (Smith, 1853)	species	Bordano	46.3208	13.0953	WGS84	IT	224	Natural		Syringa sp.
138	Citizen Science	2019-08-01	Animalia	Megachile (Callomegachile) sculpturalis (Smith, 1853)	species	Civitella di Romagna	44.0047	11.946	WGS84	IT	219	Rural		Wisteria sp.
139	Citizen Science	2019-08-02	Animalia	Megachile (Callomegachile) sculpturalis (Smith, 1853)	species	Cervino	41.0313	14.4439	WGS84	IT	140	Rural		Wisteria sp.
140	Citizen Science	2019-07-31	Animalia	Megachile (Callomegachile) sculpturalis (Smith, 1853)	species	Sestola	44.2598	10.7543	WGS84	IT	1020	Rural		Lavandula sp.
141	Citizen Science	2019-07-30	Animalia	Megachile (Callomegachile) sculpturalis (Smith, 1853)	species	Ponteranica	45.7225	9.6492	WGS84	IT	245	Rural		Lavandula sp.
142	Citizen Science	2019-07-30	Animalia	Megachile (Callomegachile) sculpturalis (Smith, 1853)	species	Montale	43.9484	11.0241	WGS84	IT	85	Rural		Lavandula sp.
143	Citizen Science	2019-07-19	Animalia	Megachile (Callomegachile) sculpturalis (Smith, 1853)	species	Pordenone	45.9146	12.8599	WGS84	IT	24	Urban	Natural cavity/elsewhere
144	Citizen Science	2019-07-27	Animalia	Megachile (Callomegachile) sculpturalis (Smith, 1853)	species	Massa Marittima	43.0765	11.0029	WGS84	IT	380	Rural		Lavandula sp.
145	Citizen Science	2019-07-18	Animalia	Megachile (Callomegachile) sculpturalis (Smith, 1853)	species	Gogna	45.522	11.5363	WGS84	IT	39	Rural		Lavandula sp.
146	Citizen Science	2019-07-23	Animalia	Megachile (Callomegachile) sculpturalis (Smith, 1853)	species	Pineto	42.6075	14.0688	WGS84	IT	4	Rural
147	Citizen Science	2019-07-17	Animalia	Megachile (Callomegachile) sculpturalis (Smith, 1853)	species	Brunico	46.7971	11.9355	WGS84	IT	838	Urban		ID 4
148	Citizen Science	2019-07-17	Animalia	Megachile (Callomegachile) sculpturalis (Smith, 1853)	species	Altare	44.3367	8.34153	WGS84	IT	398	Rural		Lavandula sp.
149	Citizen Science	2019-07-12	Animalia	Megachile (Callomegachile) sculpturalis (Smith, 1853)	species	L'Aquila	42.3705	13.3491	WGS84	IT	714	Rural		Scabiosa sp.
150	Citizen Science	2019-07-10	Animalia	Megachile (Callomegachile) sculpturalis (Smith, 1853)	species	Colombaro	44.5487	10.9005	WGS84	IT	94	Rural
151	Citizen Science	2019-07-09	Animalia	Megachile (Callomegachile) sculpturalis (Smith, 1853)	species	San Secondo di Pinerolo	44.8528	7.30354	WGS84	IT	413	Rural		Lavandula sp.
152	Citizen Science	2019-07-04	Animalia	Megachile (Callomegachile) sculpturalis (Smith, 1853)	species	Gallarate	45.6662	8.79219	WGS84	IT	238	Urban
153	Citizen Science	2019-06-30	Animalia	Megachile (Callomegachile) sculpturalis (Smith, 1853)	species	San Giovanni in Croce	45.0756	10.3487	WGS84	IT	28	Rural		Lavandula sp.
154	Citizen Science	2019-06-18	Animalia	Megachile (Callomegachile) sculpturalis (Smith, 1853)	species	Mirabello	44.8335	11.4613	WGS84	IT	15	Rural		Wisteria sp.
155	Data mining	2019-07-23	Animalia	Megachile (Callomegachile) sculpturalis (Smith, 1853)	species	Fraisse, Usseaux	45.0412	6.97886	WGS84	IT	1421	Natural		Cirsium sp.
156	Data mining	2019-07-25	Animalia	Megachile (Callomegachile) sculpturalis (Smith, 1853)	species	Montemezzo	46.1844	9.36848	WGS84	IT	522	Natural
157	Data mining	2019-07-01	Animalia	Megachile (Callomegachile) sculpturalis (Smith, 1853)	species	Campomorone	44.5092	8.89185	WGS84	IT	200	Rural
158	Data mining	2019-07-18	Animalia	Megachile (Callomegachile) sculpturalis (Smith, 1853)	species	Brescia	45.5338	10.2328	WGS84	IT	134	Urban		Lavandula sp.
159	Data mining	2019-07-19	Animalia	Megachile (Callomegachile) sculpturalis (Smith, 1853)	species	Udine	46.0636	13.2421	WGS84	IT	113	Urban		Wisteria sp.
160	Data mining	2019-08-10	Animalia	Megachile (Callomegachile) sculpturalis (Smith, 1853)	species	Pisa	43.6841	10.4214	WGS84	IT	4	Urban	artificial nest
161	Direct observation	2019-07-08	Animalia	Megachile (Callomegachile) sculpturalis (Smith, 1853)	species	Isola Vicentina	45.6099	11.4264	WGS84	IT	340	Natural		Lavandula sp.
162	Direct observation	2019-08-12	Animalia	Megachile (Callomegachile) sculpturalis (Smith, 1853)	species	Marghera	45.4675	12.2192	WGS84	IT	6	Urban
163	Direct observation	2019-08-02	Animalia	Megachile (Callomegachile) sculpturalis (Smith, 1853)	species	Carmignano di Brenta	45.6332	11.7001	WGS84	IT	46	Rural
164	Direct observation	2019-07-26	Animalia	Megachile (Callomegachile) sculpturalis (Smith, 1853)	species	Caprino Veronese	45.6041	10.7975	WGS84	IT	930	Rural		Lavandula sp.
165	Direct observation	2019-07-25	Animalia	Megachile (Callomegachile) sculpturalis (Smith, 1853)	species	Castel Maggiore	44.5746	11.3637	WGS84	IT	29	Rural	artificial nest
166	Direct observation	2019-07-16	Animalia	Megachile (Callomegachile) sculpturalis (Smith, 1853)	species	Riccione	43.9979	12.6498	WGS84	IT	12	Urban		Vitex agnus-castus
167	Direct observation	2019-07-19	Animalia	Megachile (Callomegachile) sculpturalis (Smith, 1853)	species	Fumane	45.62	10.9154	WGS84	IT	600	Rural		Lavandula sp.
168	Direct observation	2019-07-13	Animalia	Megachile (Callomegachile) sculpturalis (Smith, 1853)	species	Appiano sulla Strada del Vino	46.4687	11.2473	WGS84	IT	507	Rural		Lavandula sp.
169	Direct observation	2019-08-23	Animalia	Megachile (Callomegachile) sculpturalis (Smith, 1853)	species	Carmagnola	44.8443	7.6827	WGS84	IT	236	Rural		Cirsium arvense
170	Literature	2019-08-08	Animalia	Megachile (Callomegachile) sculpturalis (Smith, 1853)	species	Imperia	43.8899	8.01851	WGS84	IT	450	Rural
171	Literature	2019-08-03	Animalia	Megachile (Callomegachile) sculpturalis (Smith, 1853)	species	Chiusanico	43.9729	7.99146	WGS84	IT	810	Natural
172	Literature	2019-07-24	Animalia	Megachile (Callomegachile) sculpturalis (Smith, 1853)	species	Bardineto	44.1901	8.13335	WGS84	IT	780	Urban
173	Literature	2019-07-20	Animalia	Megachile (Callomegachile) sculpturalis (Smith, 1853)	species	Varazze	44.3618	8.57985	WGS84	IT	1090	Natural
174	Direct observation	2019-08-16	Animalia	Megachile (Callomegachile) sculpturalis (Smith, 1853)	species	Nisportino (Elba Island)	42.8325	10.3861	WGS84	IT	1	Urban		Vitex agnus-castus
175	Direct observation	2019-08-17	Animalia	Megachile (Callomegachile) sculpturalis (Smith, 1853)	species	Nisportino (Elba Island)	42.8325	10.3861	WGS84	IT	1	Urban		Vitex agnus-castus
176	Direct observation	2019-08-22	Animalia	Megachile (Callomegachile) sculpturalis (Smith, 1853)	species	San Casciano Val di Pesa, Firenze	43.6639	11.1381	WGS84	IT	90	Rural		Helianthus annuus
177	Direct observation	2018-07-08	Animalia	Megachile (Callomegachile) sculpturalis (Smith, 1853)	species	Sefro	43.1196	12.9333	WGS84	IT	620	Natural

## Sheet: README
	GBIF IPT Template:
	Occurrence Data
	Use this template for filling in occurrence data. Upload the template to the IPT where it can be published in Darwin Core Archive (DwC-A) format. Note this template must be mapped to the Occurrence Core in the IPT.
Sheet Name	Purpose
Occurrences	This sheet is used to record a list of species at a particular place and normally on a specified date. Ideally locality information includes coordinates to support mapping.
	Notes:
	#1. The header row shows required and recommended terms. Hover over the cell to find out if it's required or recommended, and to obtain a definition of the term examples.
	#2. Additional columns can be added, but you should use DwC term names: http://rs.tdwg.org/dwc/terms/
	#3. Columns can be reordered, but the header name (equal to a DwC term name) cannot be changed.
	#4. Enter lists using the pipe (“|”) character as a separator, for applicable DwC terms only.
